# Supplementary material for: Nuclear matrix protein Matrin3 regulates alternative splicing and forms overlapping regulatory networks with PTB
Source: PubMed Central journal article supplement (PMC4365034; doi:10.15252/embj.201489852), 2015-01-19
Supplement: embj0034-0653-sd6.pdf [file embj0034-0653-sd6.pdf]

**Supplementary Table S5. Over-represented RBP binding motifs obtained by RNA-compete (Ray *et al.* 2013) in flanking introns of Matrin3 repressed exons.**

The splicing event region, RBP gene name, RNA-compete id, species of the RBP, total sites found, number of sequences with sites, log<sub>2</sub>(fold-ratio), p-value, FDR and sites logo are shown. Enriched motifs were selected after multiple test correction (FDR < 0.05). Motifs shown here include those for all RBPs (multiple species) from Ray *et al.* 2013, whereas Figure 4 shows only the enriched motifs for human proteins. See further details in main text Materials and Methods. Abbreviations, number of sequences comprised and over-represented RBP motifs for each splicing event region analyzed are shown at the foot of the table.

RBP motifs enrichment analysis: Matrin3 NEG (-PTB)(Skipping)

| region | gene name | RBP id  | species              | sites                          | seq w/ sites | log <sub>2</sub> (ratio) | p-value | FDR     | Logo    |                                                                                       |
|--------|-----------|---------|----------------------|--------------------------------|--------------|--------------------------|---------|---------|---------|---------------------------------------------------------------------------------------|
| 5IA    | 1         | MATR3   | <b>MATR3_00037</b>   | <i>Homo sapiens</i>            | 83           | 67 (35.3%)               | 1.1     | 1.85e-6 | 4.52e-4 |    |
| 5IA    | 2         | Tv_0258 | <b>Tv_0258_00258</b> | <i>Trichomonas vaginalis</i>   | 124          | 86 (45.3%)               | 0.77    | 4.15e-4 | 3.38e-2 |    |
| 3ID    | 1         | PTBP1   | <b>PTBP1_00269</b>   | <i>Homo sapiens</i>            | 222          | 124 (64.2%)              | 1.24    | 6.80e-9 | 1.66e-6 |   |
| 3ID    | 2         | PCBP1   | <b>PCBP1_00239</b>   | <i>Mus musculus</i>            | 143          | 96 (49.7%)               | 0.94    | 1.05e-5 | 7.32e-4 |  |
| 3ID    | 3         | PTBP1   | <b>PTBP1_00268</b>   | <i>Homo sapiens</i>            | 255          | 120 (62.2%)              | 0.94    | 1.08e-5 | 7.32e-4 |  |
| 3ID    | 4         | Tb_0220 | <b>Tb_0220_00220</b> | <i>Trypanosoma brucei</i>      | 181          | 112 (58%)                | 0.93    | 1.20e-5 | 7.32e-4 |  |
| 3ID    | 5         | FNE     | <b>FNE_00120</b>     | <i>Drosophila melanogaster</i> | 102          | 76 (39.4%)               | 0.86    | 1.02e-4 | 3.55e-3 |  |
| 3ID    | 6         | CG5213  | <b>CG5213_00010</b>  | <i>Drosophila melanogaster</i> | 128          | 93 (48.2%)               | 0.78    | 2.49e-4 | 7.59e-3 |  |
| 3ID    | 7         | U2AF50  | <b>U2AF50_00080</b>  | <i>Drosophila melanogaster</i> | 377          | 74 (38.3%)               | 0.8     | 3.65e-4 | 9.91e-3 |  |
| 3ID    | 8         | MATR3   | <b>MATR3_00037</b>   | <i>Homo sapiens</i>            | 89           | 64 (33.2%)               | 0.83    | 4.09e-4 | 9.98e-3 |  |
